# Supplementary material for: The huntingtin inclusion is a dynamic phase-separated compartment
Source: Life Sci Alliance. 2019 Sep 16;2(5):e201900489. doi: 10.26508/lsa.201900489 (PMC6749095; doi:10.26508/lsa.201900489)
Supplement: Supplementary file 6 [file LSA-2019-00489_TableS1.xlsx]

## Sheet: Sheet1
Table S1 Plasmids used in this study.
Plasmid	Description	Source
p415GPD	pGPD/CEN/LEU2	ATCC
pCY3090-2	mCHERRY/HYGB integration plasmid	Addgene #36231
HTT 25Q	GAL 25Q+ProGFPFLAGp303, Lindquist lab	Addgene #15576
HTT 72Q	GAL 72Q+ProGFPp416, Lindquist lab	Addgene #15582
HTT 103Q	GAL 103Q+ProGFPFLAGp303, Lindquist lab	Addgene #15577
pEB4	Htt(72Q)-GFP/CEN/LEU2, derived from p415GPD	This study
pEB9	Htt(25Q)-GFP/CEN/LEU, derived from p415GPD	This study
pEB11	Htt(103Q)-GFP/CEN/LEU2, derived from p415GPD	This study
pEB14	Htt(72Q)-mCherry/CEN/LEU2, derived from pEB4	This study
pEB16	Htt(72Q)-mEos2/CEN/LEU2, derived from pEB4	This study
